# Supplementary material
Source: PubMed Central journal article supplement (PMC7983689)
Supplement: rycan190047suppa1.pdf [file rycan190047suppa1.pdf]

**Table E1: Overview of Studies on Radiomic Applications for Brain Tumor Evaluation**

| Molecular or clinical endpoint predicted                               | Modality and sequence(s) used                 | Total patient number   | Features* | Classifiers** | AUC                     | Acc      | Ref.                       |
|------------------------------------------------------------------------|-----------------------------------------------|------------------------|-----------|---------------|-------------------------|----------|----------------------------|
| Differentiation of GBM and brain mets or met subtypes                  | MRI T1 C+                                     | 439                    | TR        | CL            | 0.96                    | 85       | Artzi et al, 2019 (39)     |
| GBM Survival                                                           | MRI T1 C+ FLAIR T2                            | 217                    | TR        | CL            | N/A                     | N/A      | Bae et al, 2019 (38)       |
| Craniopharyngioma: BRAF and CTNNB1 mutations                           | MRI T1 C+                                     | 44                     | TR        | CL            | 0.89–0.93               | 86%–93%  | Chen et al (46)            |
| GBM Survival (low vs high risk/low risk: 12 months)                    | MRI T1 C+                                     | 127                    | TR        | CL            | 0.815–0.851             |          | Chen et al 2019 (83)       |
| GBM Survival                                                           | MRI T1 C+ Perfusion DWI                       | 93                     | TR        | CL            | NA                      | NA       | Kim et al, 2019 (85)       |
| Prediction type of brain mets (breast, SCLC, NSCLC, GI and melanoma)   | MRI T1 C- T1 C+ FLAIR                         | 189 patients, 658 mets | TR        | CL            | 0.83–0.89               |          | Knies et al, 2019 (49)     |
| GBM vs PCNSL                                                           | MRI T1 C+                                     | 76                     | TR        | CL            |                         | 75%      | Kunimatsu et al, 2019 (44) |
| GBM IDH1 mutation status                                               | MRI T1 C+ FLAIR                               | 88                     | TR        | CL            |                         | 83.4%    | Lee et al, 2019 (65)       |
| GBM OS and PFS (12 month)                                              | MRI Perfusion DWI MRS                         | 80                     | TR        | CL            | 0.81 (OS)<br>0.77 (PFS) |          | Li et al, 2019 (84)        |
| HGG (WHO III–IV) Survival (short vs long: 650 days)                    | MRI T1 C+ DTI rs-fMRI                         | 68                     | DL        | CL            | 90.46%                  | 90.66%   | Nie et al (2019) (33)      |
| Pituitary adenomas Prediction of cavernous sinus invasion              | MRI T1 C+ T2                                  | 194                    | TR        | CL            | 0.826–0.871             |          | Niu et al (2019) (88)      |
| Meningioma subtype Prediction (Meningiothelial, Fibrous, Transitional) | MRI T1 C+                                     | 241                    | TR        | CL            | 0.913–0.951             |          | Niu et al (2019) (47)      |
| Differentiate GBM from mets                                            | MRI T1 C- T1 C+ T2                            | 412                    | TR        | CL            | 0.9                     | 83%      | Qian et al (2019) (40)     |
| Classification of brain tumor (GBM, mets, meningioma, PCNSL)           | MRI T1 C- T1 C+ T2 FLAIR T2-GRE Perfusion DTI | 141                    | TR        | CL            |                         | 92.7–97% | Shrot et al (2018) (41)    |
| Gliomas (WHO 2007 I–IV)                                                | MRI Perfusion                                 | 217                    | TR        | CL            | 0.911–0.94              |          | Su et al, 2019 (57)        |

|                                                                   |                                                              |                                    |                             |    |                                  |        |                            |
|-------------------------------------------------------------------|--------------------------------------------------------------|------------------------------------|-----------------------------|----|----------------------------------|--------|----------------------------|
| Differentiating glioma grade (low vs high + pairwise)<br>Ki-67 LI | DWI<br>T1C+<br>T1FLAIR,<br>T2FLAIR,<br>T2FSE                 |                                    |                             |    |                                  |        |                            |
| GBM OS                                                            | MRI<br>T1 C-<br>T1 C+<br>FLAIR                               | 159                                | TR                          | CL | NA                               |        | Tixier et al (2019) (110)  |
| Gliomas WHO II-IV Differentiate LGG from HGG                      | MRI<br>T1 C-<br>T1 C+<br>T2<br>FLAIR<br>DTI Perfusion<br>MRS | 40                                 | TR                          | CL | 0.955                            | 95.5%  | Vamvakas et al (2019) (58) |
| HGG survival long (> 22 mo) vs short (< 22 mo)                    | MRI<br>T1 C+<br>T2                                           | 221                                | TR                          | CL |                                  | 87.93% | Wu et al, 2019 (86)        |
| Gliomas IDH1 status                                               | MRI<br>T1 C-<br>T1 C+<br>T2<br>FLAIR                         | 126<br>TCIA                        | TR                          | CL | 0.931                            | 88.5%  | Wu et al (2019) (66)       |
| GBM survival                                                      | MRI<br>T1 C-<br>T1 C+<br>T2<br>FLAIR                         | 105<br>TCIA                        | TR                          | CL | NA                               | NA     | Zhang et al (2019) (87)    |
| Gliomas WHO II or III IDH status ± TERT promoter mutation         | MRI<br>T1 C-<br>T1 C+<br>FLAIR                               | 199                                | TR                          | CL |                                  | 56-87% | Arita et al 2018 (61)      |
| Mets: Response to Stereotactic Radiosurgery                       | CT                                                           | 110                                | DL                          | DL | 0.761-0.856                      |        | Cha et al 2018 (36)        |
| Glioma grading (high vs low)                                      | MRI<br>T1 C-<br>T1 C+<br>T2<br>FLAIR                         | 285<br>Two public datasets         | TR                          | CL | 0.903                            | 88.54% | Cho et al (2018) (55)      |
| Glioma grading (high vs low)                                      | MRI<br>T1 C+<br>FLAIR<br>DWI                                 | 94                                 | TR                          | CL | 0.9                              |        | Ditmer et al (2018) (56)   |
| Pilocytic astrocytoma vs GBM                                      | MRI<br>T1C+                                                  | 66                                 |                             | CL |                                  | 86%    | Dong et al, 2018 (45)      |
| GBM vs PCNSL                                                      | MRI<br>T1 C+<br>T2<br>DWI                                    | 143                                | TR                          | CL | 0.956                            | 94.7%  | Kim et al, 2018 (42)       |
| Glioma WHO grade II or III IDH1 and 1p/19q status                 | MRI<br>T1 C-<br>T2<br>FLAIR                                  | 108                                | TR                          | CL | 0.8224 (IDH1)<br>0.6854 (1p/19q) |        | Kuthuru et al, 2018 (64)   |
| GBM IDH1 status                                                   | MRI<br>T1 C-<br>T1 C+<br>T2<br>FLAIR                         | 651<br>TCIA & 3 local institutions | TR (Segmentation using CNN) | CL | 0.96                             | 97%    | Li et al, 2018 (34)        |
| GBM OS (long-term group ≥ 12 mo vs short-term < 12 mo)            | MRI<br>T1 C-<br>T1 C+<br>T2<br>FLAIR                         | 119<br>TGIA                        | TR                          | CL | 0.7915                           | 80.67% | Liu et al, 2018 (80)       |
| Glioma WHO II or III PFS                                          | MRI<br>T2                                                    | 300<br>Chinese Glioma              | TR                          | CL | NA                               | NA     | Liu et al, 2018 (81)       |

|                                                                                                                           |                                          | Genome Atlas and TCIA            |    |    |                                                 |                                          |                                |
|---------------------------------------------------------------------------------------------------------------------------|------------------------------------------|----------------------------------|----|----|-------------------------------------------------|------------------------------------------|--------------------------------|
| Differentiate GBM and PCNSL                                                                                               | MRI<br>T1 C+<br>T2<br>DWI                | 70                               | TR | CL | 0.86–0.98                                       |                                          | Nakagawa et al (2018) (43)     |
| Glioma WHO I-IV Survival (36 mo)                                                                                          | PET ( <sup>11</sup> C-MET)               | 70                               | TR | CL | 0.72–0.9                                        |                                          | Papp et al (2018) (37)         |
| Gliomas WHO II: IDH1 and 1p/19q status                                                                                    | MRI<br>DTI                               | 93                               | TR | CL | 0.853 (IDH1)<br>0.8071p/19q in IDH1mutant group |                                          | Park et al, 2018 (62)          |
| Glioma WHO II and III IDH1 and 1p/19q status                                                                              | MRI<br>T1 C-<br>T1 C+<br>FLAIR<br>DTI    | 175                              | TR | CL | 0.778                                           |                                          | Park et al, 2018 (63)          |
| Brain mets post SRS: True progression vs radionecrosis                                                                    | MRI<br>T1 C+<br>FLAIR                    | 66 patients<br>82 lesions        | TR | CL | 0.79                                            |                                          | Peng et al, 2018 (75)          |
| GBM OS (short vs long) or 3-class (short, medium and long)                                                                | MRI<br>T1 C+<br>T2<br>FLAIR              | 163 BraTS 2017 dataset           | TR | CL |                                                 | 98.7% (2-class)<br>88.95% (3-Class)      | Sanghani et al, 2018 (82)      |
| Gliomas & mets Differentiate vasogenic edema from nonenhancing tumor                                                      | MRI<br>T1 C+<br>T2<br>FLAIR<br>Perfusion | 9 HGG patients + 9 mets patients | TR | CL |                                                 | 91.6%–97.6%                              | Sengupta et al (2018) (59)     |
| LGG (WHO II) with IDH1-mutated tumors: classification based on 1p/19q status                                              | MRI<br>FLAIR<br>T1 C-<br>T2              | 47                               | TR | CL | 0.87                                            | 87%                                      | Shoftly et al (2018) (68)      |
| Prediction of nonfunctioning pituitary adenoma subtypes (null cell adenomas from other nonfunctioning pituitary adenomas) | MRI<br>T1 C-<br>T1 C+                    | 112                              | TR | CL | 0.8042                                          | 81.1%                                    | Zhang et al (2018) (48)        |
| LGG 1p/19q status                                                                                                         | MRI<br>T1 C+<br>T2                       | 159                              | DR | DL |                                                 | 87.7%                                    | Akkus et al, 2017 (67)         |
| GBM + LGG (II, III, IV) Distinguishing GBM from grade II or III glioma                                                    | MRI<br>T1 C+                             | 107 TCGA                         | TR | CL | 0.94                                            | 93%                                      | Li-Chun Hsieh et al, 2017 (53) |
| Glioma (WHO II and III) p53 status                                                                                        | MRI<br>T2                                | 272                              | TR | CL | 0.763                                           | 70.7%                                    | Li et al, 2017 (71)            |
| GBM OS (long-term ≥ 12 mo vs short-term OS < 12 mo)                                                                       | MRI<br>T1 C+                             | 133 TCGA                         | TR | CL | 0.8104                                          | 78.20%                                   | Liu et al, 2017 (78)           |
| HGG (WHO III-IV) IDH status                                                                                               | MRI<br>T1 C-<br>T1 C+<br>T2<br>FLAIR     | 120                              | TR | CL | 0.9231                                          | 89%                                      | Zhang et al (2017) (60)        |
| Glioma (WHO grade I-IV) classification LGG vs HGG                                                                         | MRI<br>T1 C+<br>FLAIR<br>DWI             | 120                              | TR | CL |                                                 | 94.5% (HGG vs LGG) and 96.1% (WHO grade) | Zhang et al (2017) (54)        |

|                                                                                                                   |                                         |                         |    |         |                                                    |                                                           |                                |
|-------------------------------------------------------------------------------------------------------------------|-----------------------------------------|-------------------------|----|---------|----------------------------------------------------|-----------------------------------------------------------|--------------------------------|
| Classification WHO II, III, vs IV                                                                                 | Perfusion (C+) + ASL                    |                         |    |         |                                                    |                                                           |                                |
| GBM Survival (< 400 days vs ≥ 400 days) Spatial Imaging (Habitat) Biomarkers                                      | MRI T1 C+ T2 FLAIR                      | 54 TCGA                 | TR | CL      |                                                    | 86.36%–87.5%                                              | Zhou et al (2017) (79)         |
| GBM Global DNA methylation subgroups MGMT promoter methylation status Hallmark copy number variations             | MRI T1 C- T1 C+ FLAIR DWI Perfusion SWI | 152                     | TR | CL      |                                                    | 63% (EGFR amplification) 61% (RTK II)                     | Kickingereder et al, 2016 (94) |
| Recurrent GBM (WHO IV) on bevacizumab monotherapy or bevacizumab and irinotecan combination therapy OS, PFS       | MRI T1 C- T1 C+ T2 FLAIR DWI            | 126                     | TR | CL      | NA                                                 | NA                                                        | Chang et al, 2016 (76)         |
| GBM MGMT promoter status                                                                                          | MRI T1 C+ T2                            | 155                     | TR | CL      | 0.85                                               |                                                           | Korfiatis et al, 2016 (69)     |
| Primary or mets Differentiate Radiation necrosis from recurrent brain tumor                                       | MRI T1 C+ T2 FLAIR                      | 58                      | TR | CL      | 0.79 (primary) 0.79 (mets)                         | 80%                                                       | Tiwari et al (2016) (74)       |
| HGG (WHO III or IV) Survival (good > 650 days) vs bad (< 650 days)                                                | MRI DTI fMRI                            | 68                      | TR | CL      |                                                    | 75%                                                       | Liu et al, 2016 (77)           |
| GBM OS (long/medium/short: 6 mo, 6–18 mo, 18+ mo) Molecular subtype (classic, mesenchymal, proneural, and neural) | MRI T1 C- T1 C+ T2 FLAIR DTI Perfusion  | 105                     | TR | CL      | 0.84–0.91 (survival) 0.75–0.92 (molecular subtype) | 77.14–88.57% (survival) 75.76%–87.88% (molecular subtype) | Macyszyn et al (2016) (70)     |
| Gliomas (WHO III-IV) Survival (long vs short–22 mo)                                                               | MRI T1 C+ DTI fMRI                      | 69                      | DL | DL + CL |                                                    | 89.85%                                                    | Nie et al (2016) (32)          |
| GBM Differentiate pseudo progression from true progression                                                        | MRI DTI                                 | 161                     | TR | CL      | 0.87                                               |                                                           | Zhang et al (2016) (73)        |
| Brain mets Distinction from radiation necrosis                                                                    | MRI T1c+                                | 73 patients 115 lesions | TR | CL      | 0.94                                               |                                                           | Larroza et al, 2015 (72)       |
| Glioma grading WHO II vs III-IV                                                                                   | MRI MRS                                 | 28                      | TR | CL      | 0.911                                              |                                                           | Ranjith et al (2015) (51)      |

The table is meant to provide an overview of the current literature and by necessity may result in over-generalization of the results. Interested readers are encouraged to consult the primary articles for detailed results and analysis of study design, strengths and weaknesses. Unless not available, the values (AUC, accuracy) provided are generally for the test or validation set.

\* Features extracted are either classified as Traditional Radiomics (TR), referring to hand-crafted features or deep radiomics (DR), referring to lesion analysis and features extraction using deep learning. Please note that some studies also used other features or clinical characteristics in addition to radiomic features that are not specified here.

\*\* The classifier used is categorized as either classic (CL), comprising classic machine learning approaches or in a few studies standard statistical approaches or as deep learning (DL).

Abbreviations: Acc = accuracy, AUC = area under the curve, GBM = glioblastoma, HGG = high grade glioma, IDH1 = isocitrate dehydrogenase 1, LGG = low grade glioma, MGMT promoter = O(6)-methylguanine-DNA methyltransferase promoter, NSCLC = non-small cell lung cancer, PCNSL = primary CNS lymphoma, OS = overall survival, PFS = progression free survival, SCLC = small cell lung cancer.
